# Supplementary material for: Design, synthesis, antiproliferative activity and docking studies of quinazoline derivatives bearing oxazole or imidazole as potential EGFR inhibitors
Source: Royal Society of Chemistry journal article supplement (doi:10.1039/c8nj03594f), 2018-01-01

<sup>1</sup>H NMR spectrum of compound **8a**

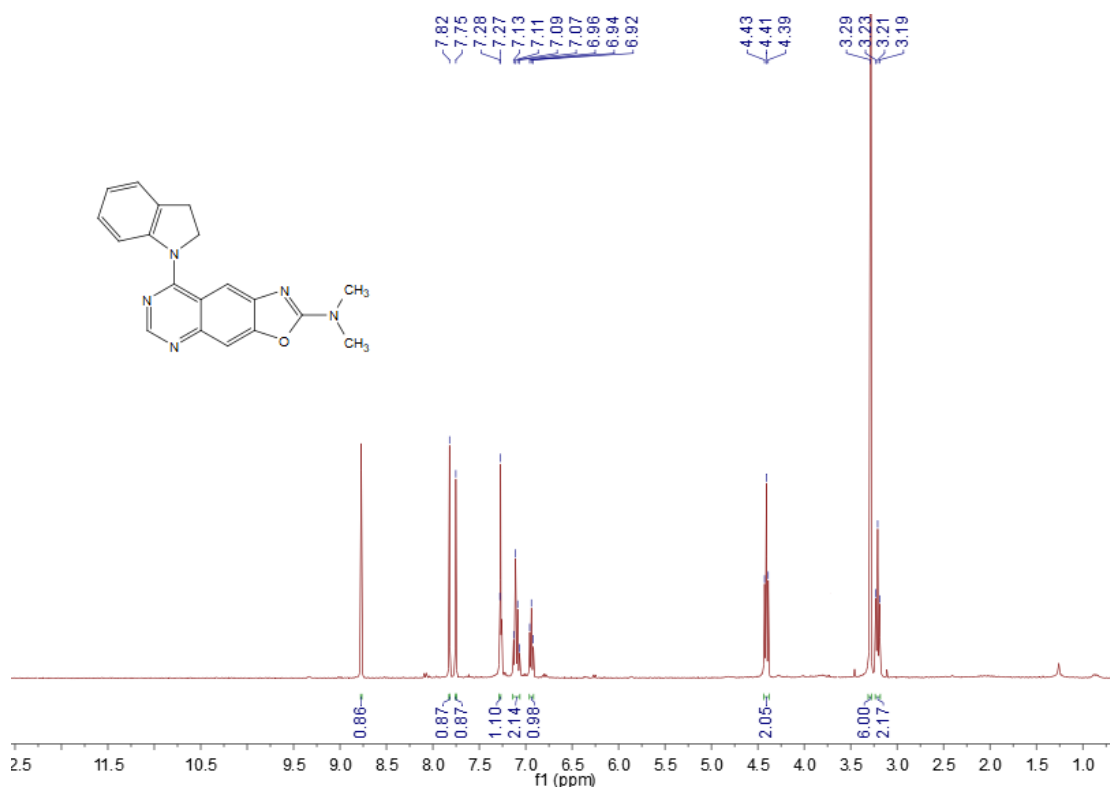

<sup>1</sup>H NMR spectrum of compound **8c**

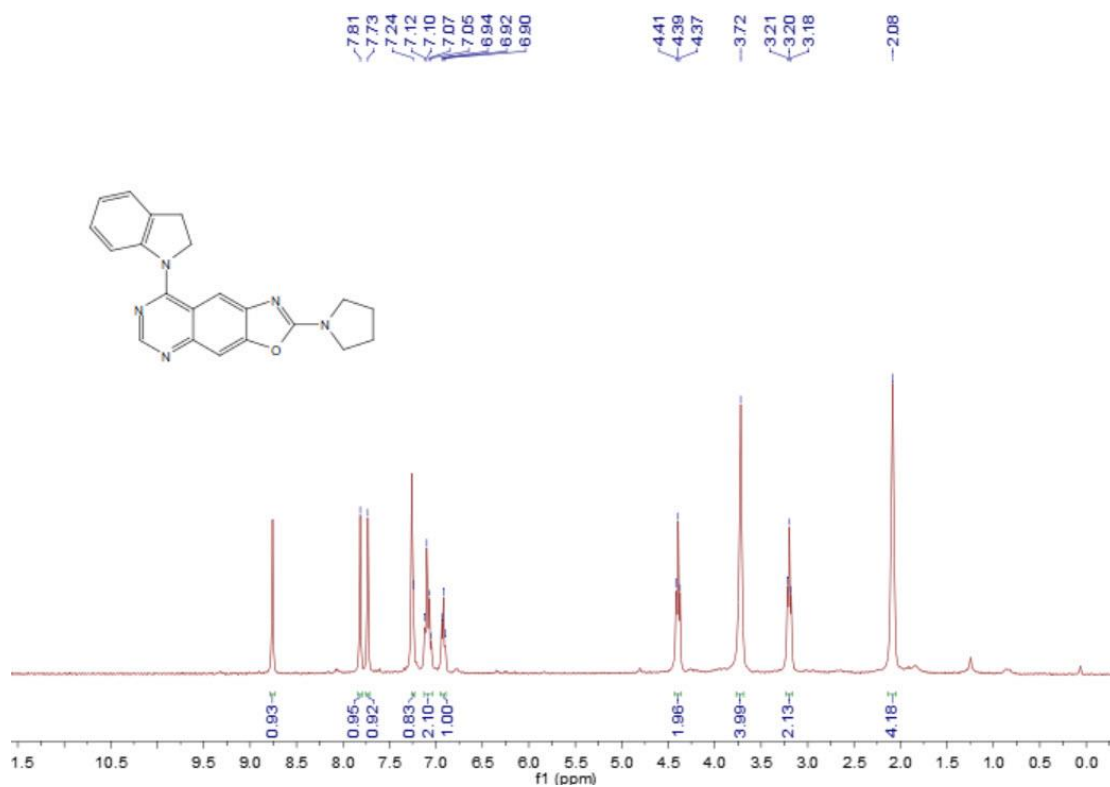

<sup>1</sup>H NMR spectrum of compound **8d**

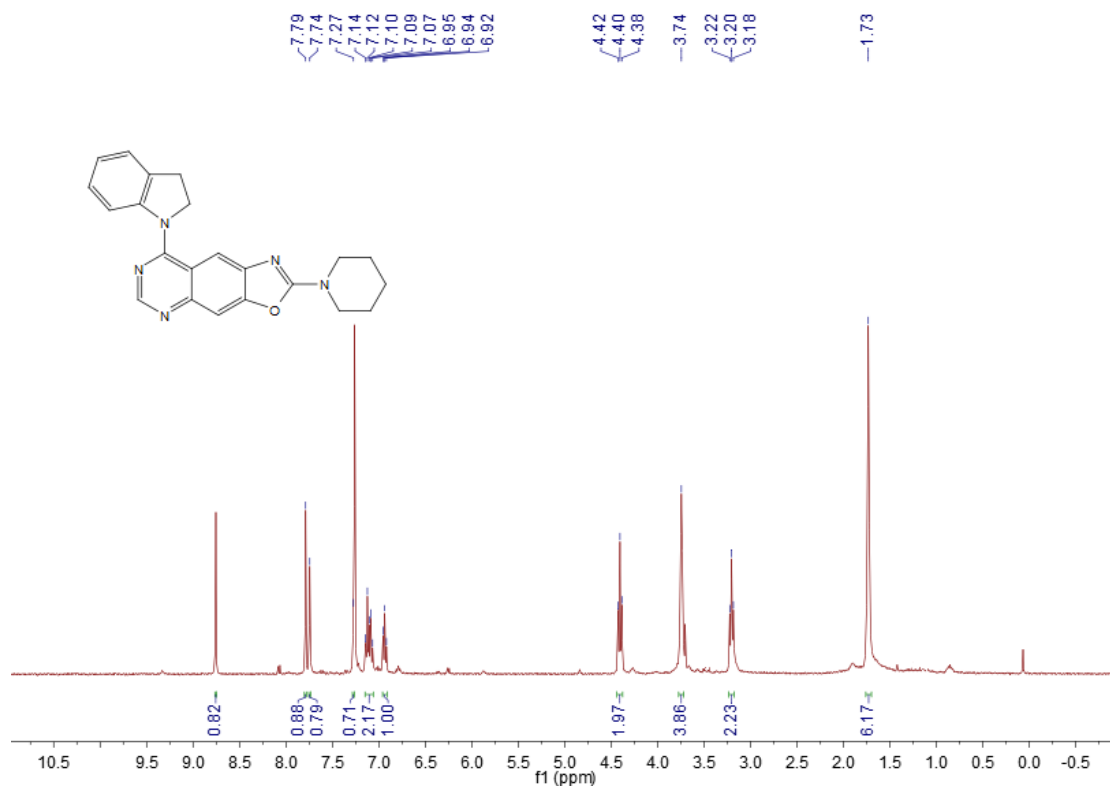

<sup>1</sup>H NMR spectrum of compound **8e**

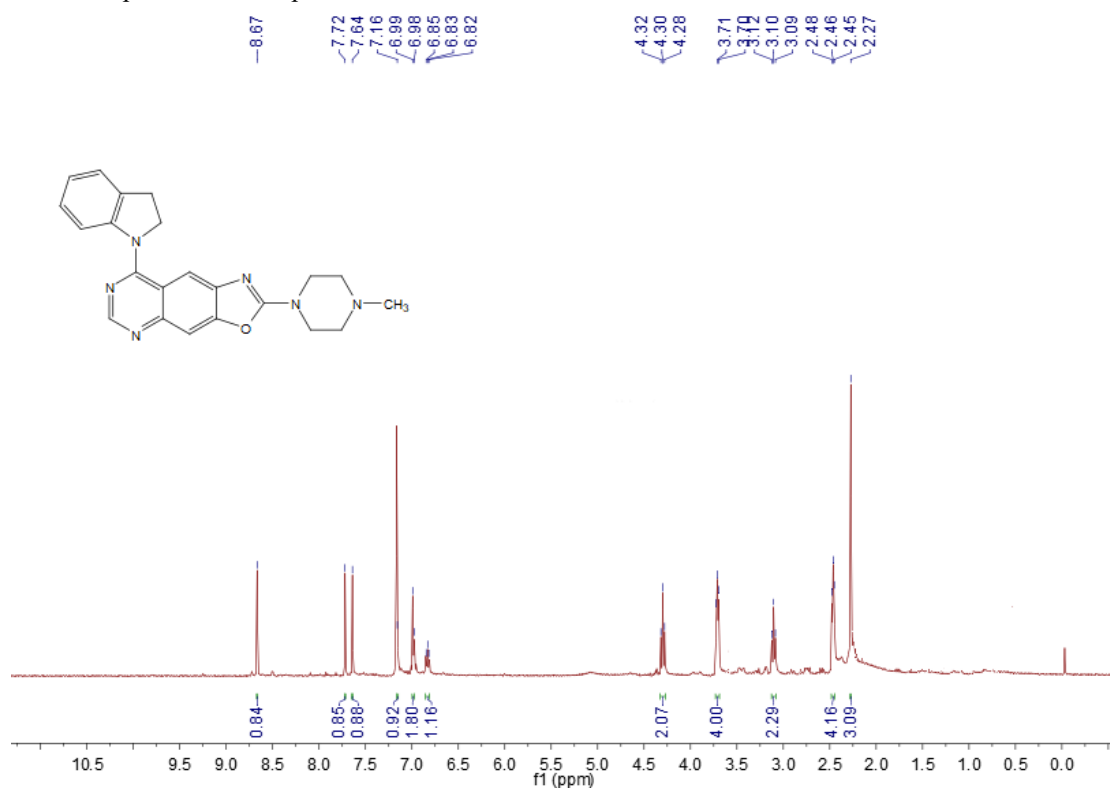

<sup>1</sup>H NMR spectrum of compound **8f**

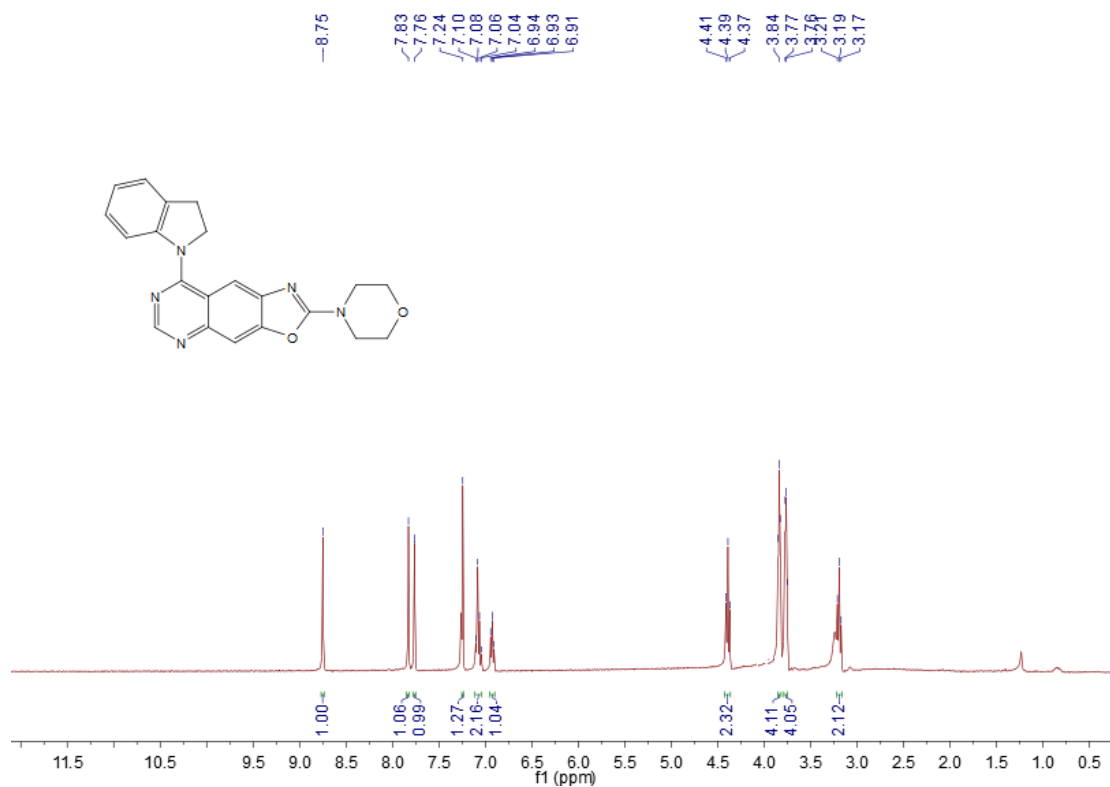

<sup>1</sup>H NMR spectrum of compound **9a**

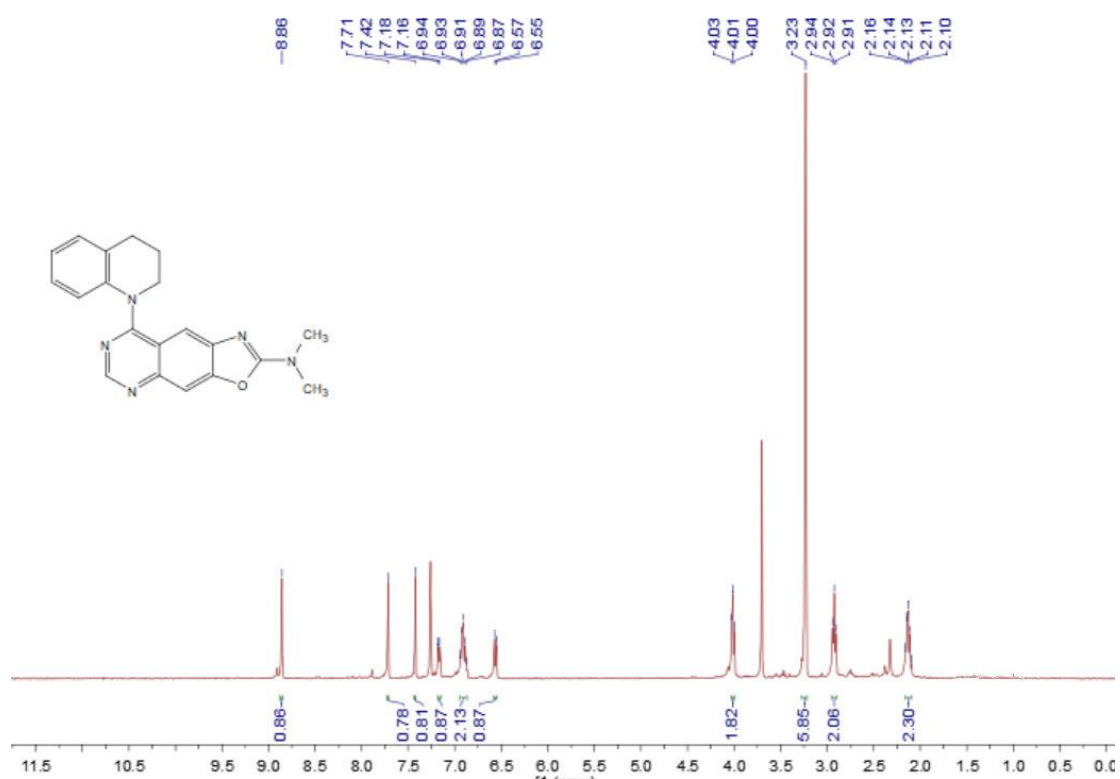

<sup>1</sup>H NMR spectrum of compound **9c**

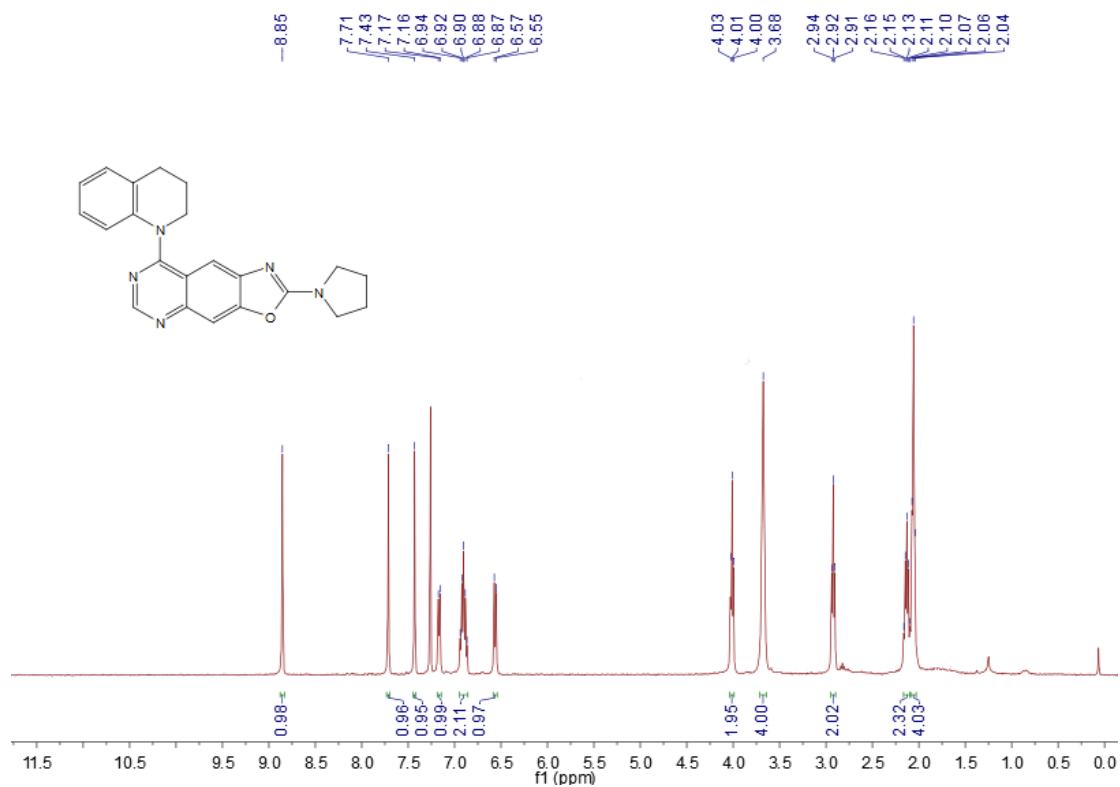

<sup>1</sup>H NMR spectrum of compound **9d**

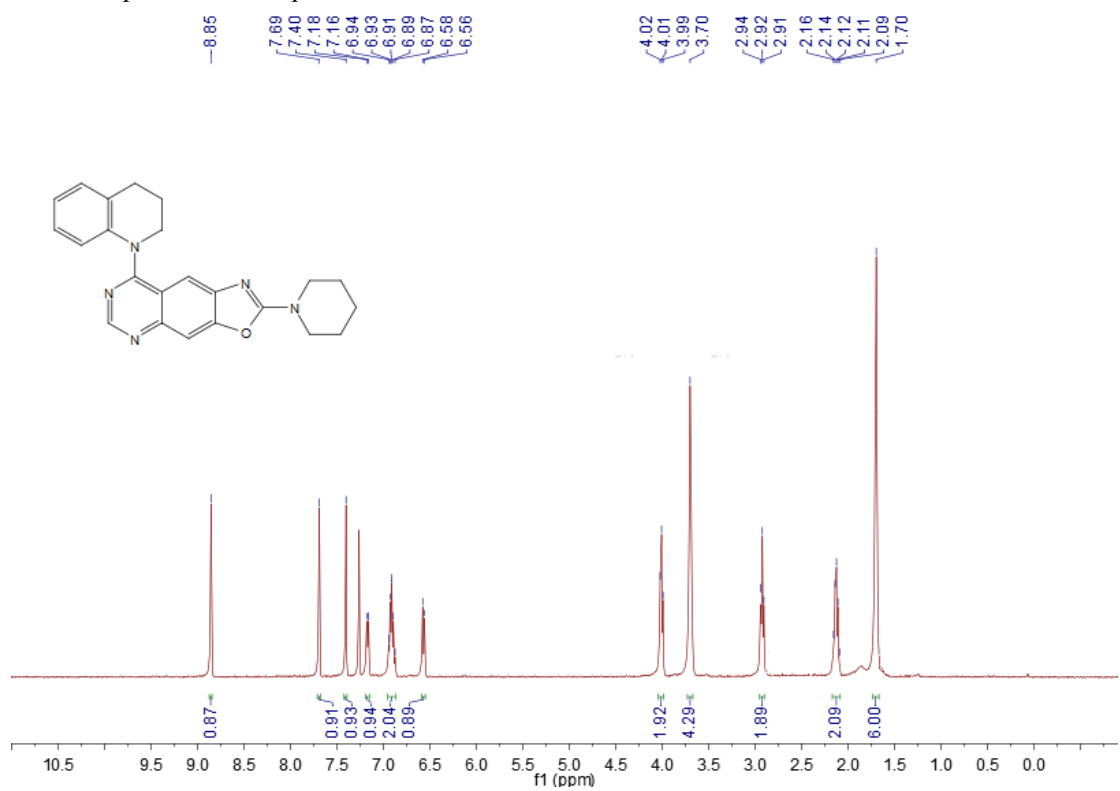

<sup>1</sup>H NMR spectrum of compound **9e**

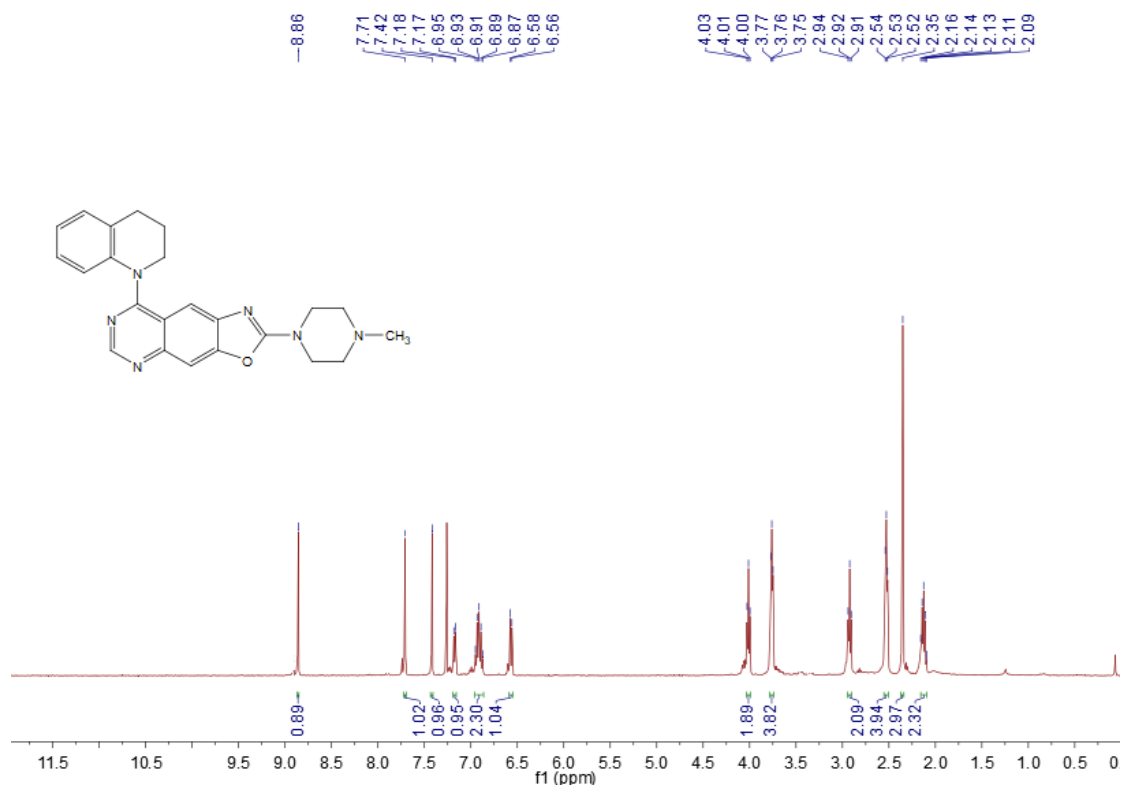

<sup>1</sup>H NMR spectrum of compound **10a**

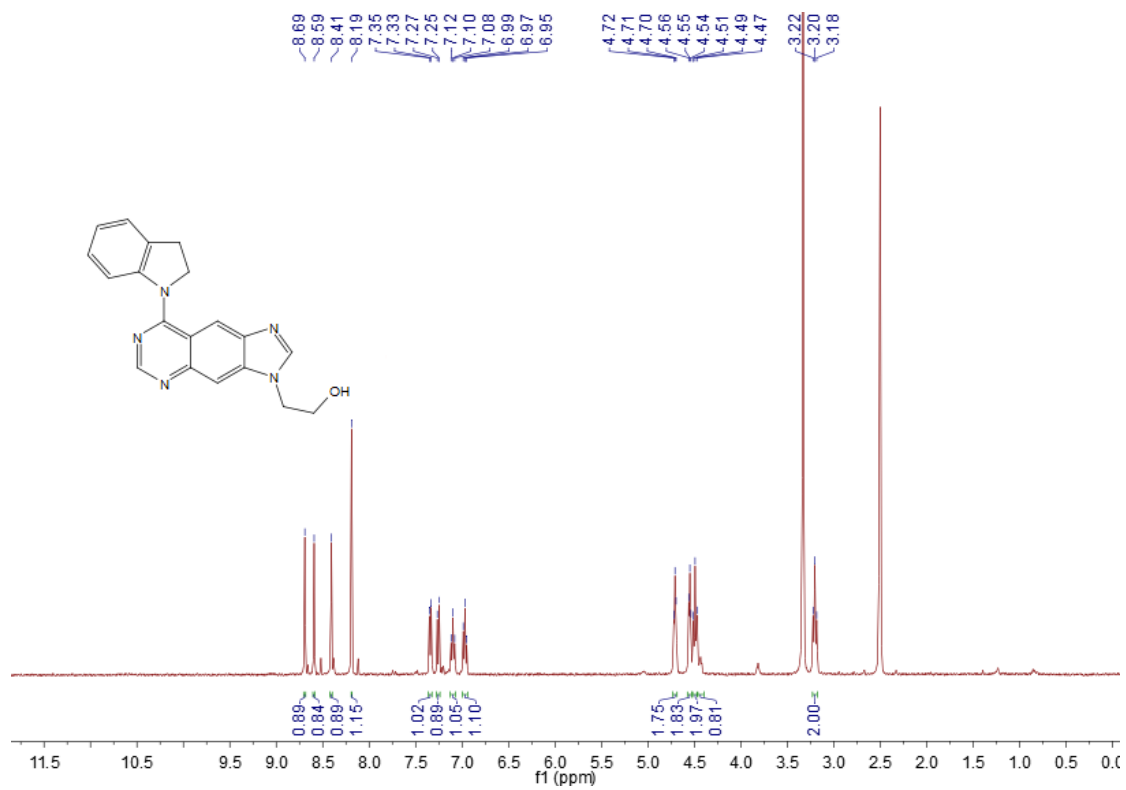

<sup>1</sup>H NMR spectrum of compound **10b**

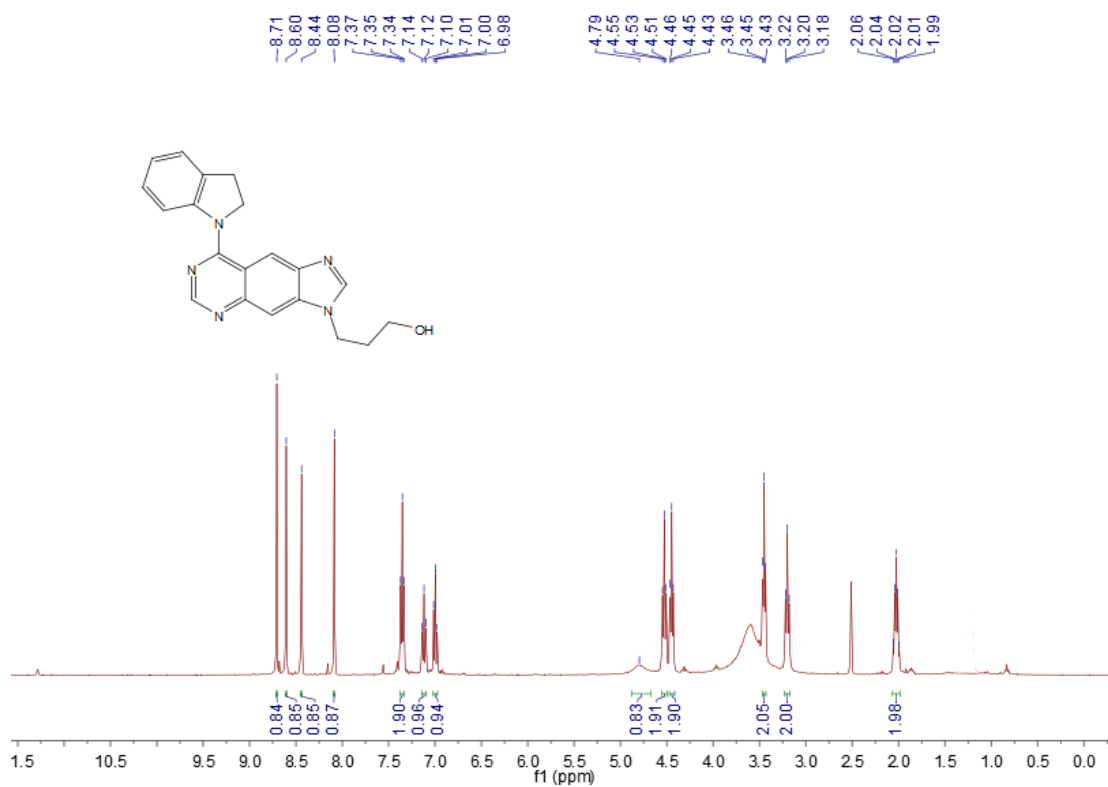

<sup>1</sup>H NMR spectrum of compound **10c**

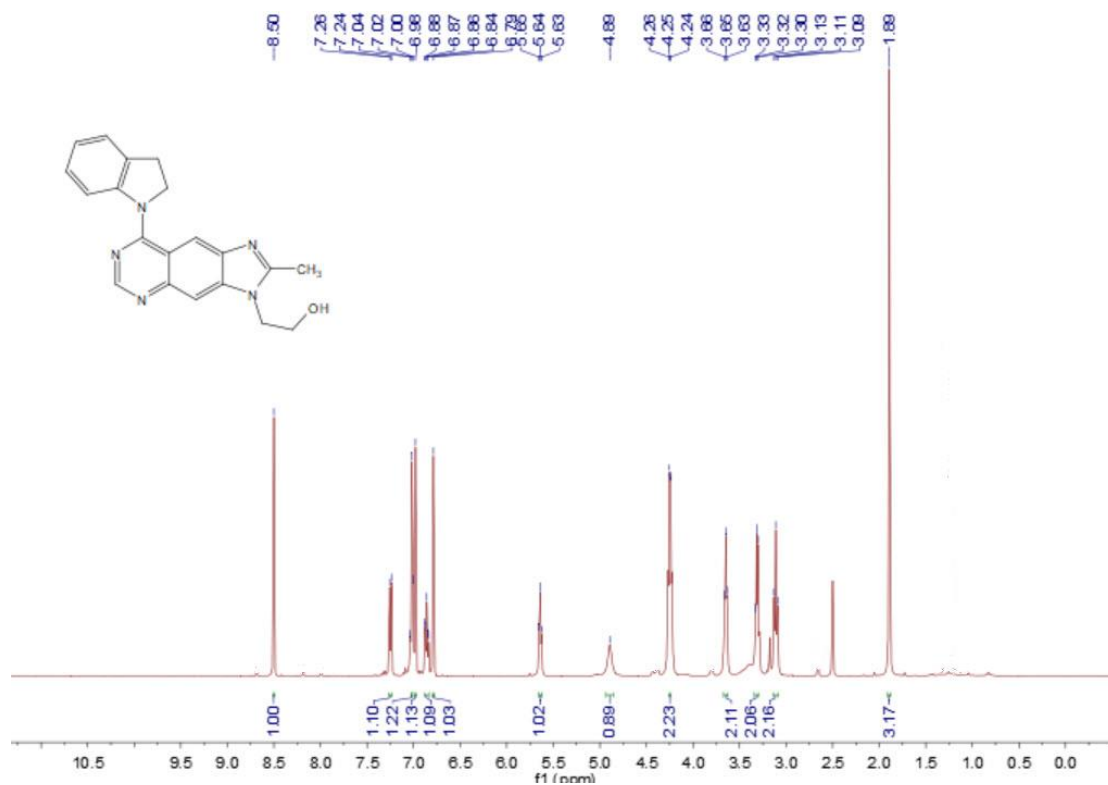

<sup>13</sup>C NMR spectrum of compound **10c**

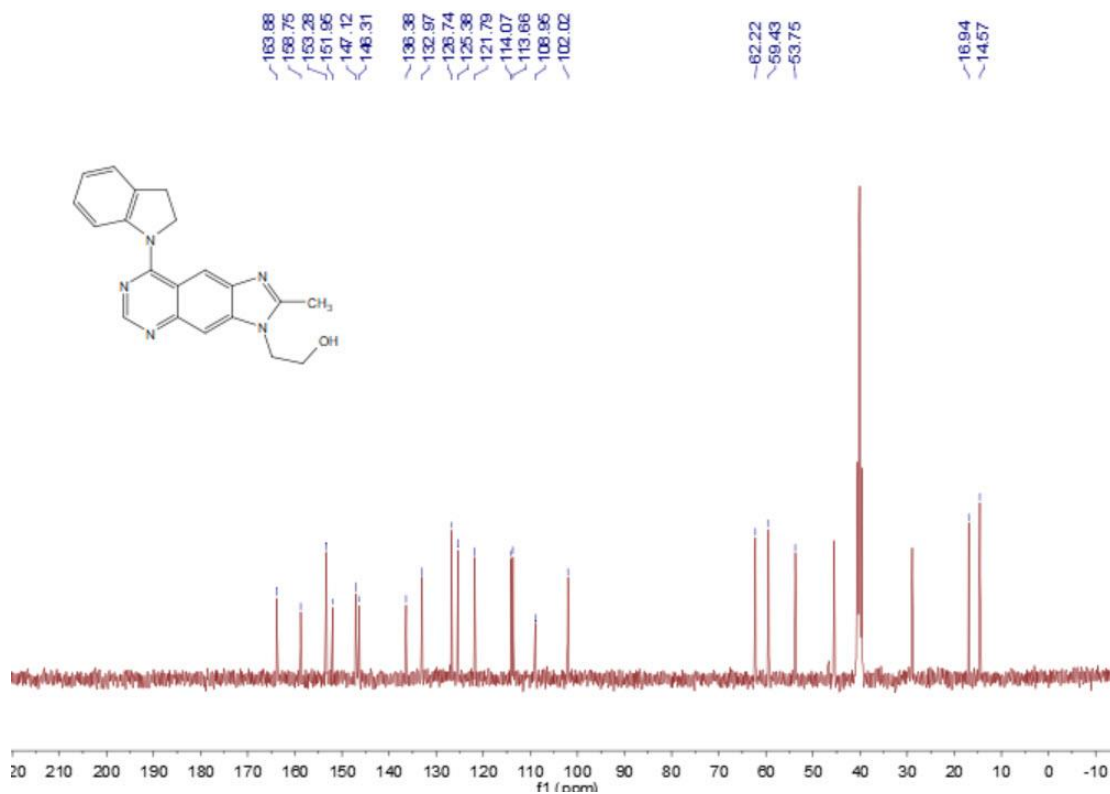

<sup>1</sup>H NMR spectrum of compound **10d**

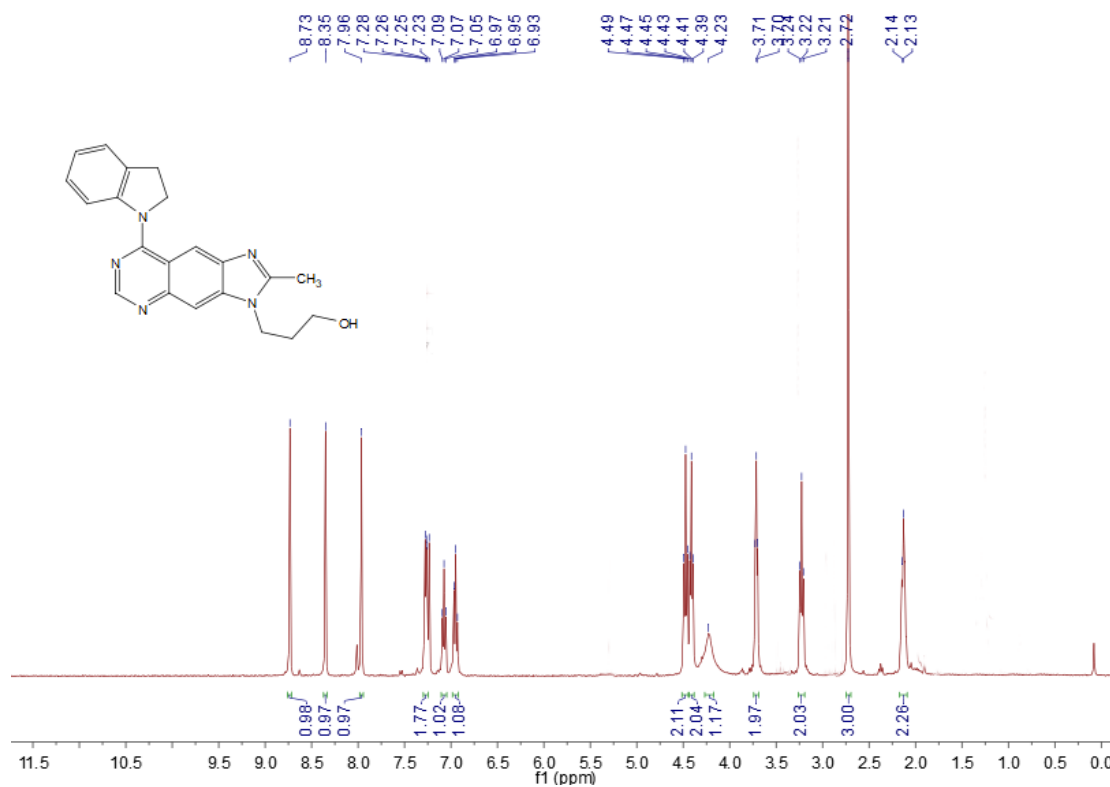

<sup>1</sup>H NMR spectrum of compound **11a**

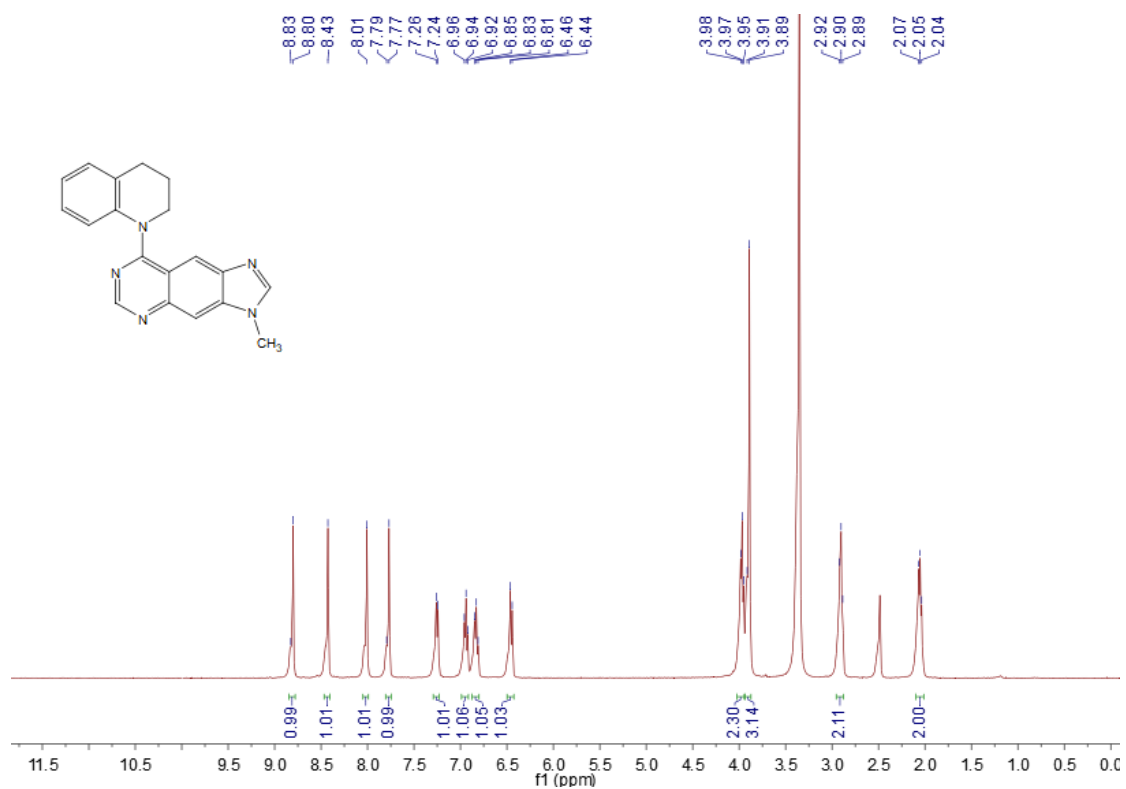

<sup>1</sup>H NMR spectrum of compound **11b**

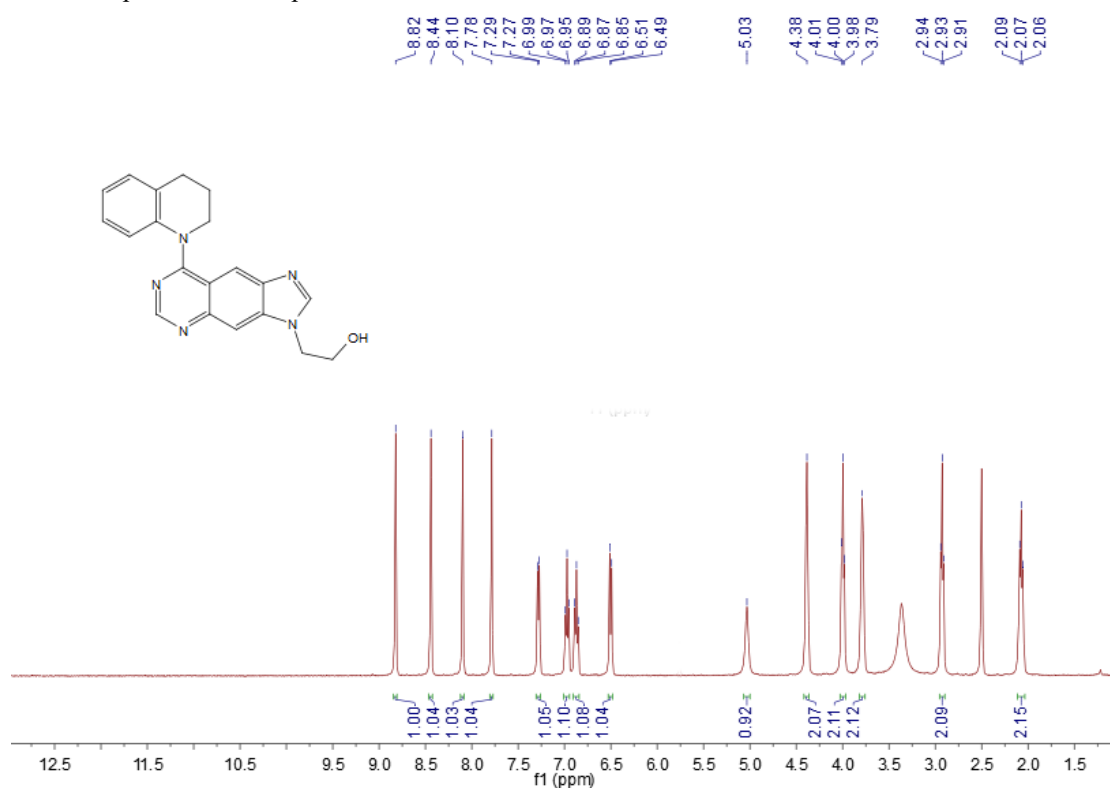



<sup>1</sup>H NMR spectrum of compound **11c**

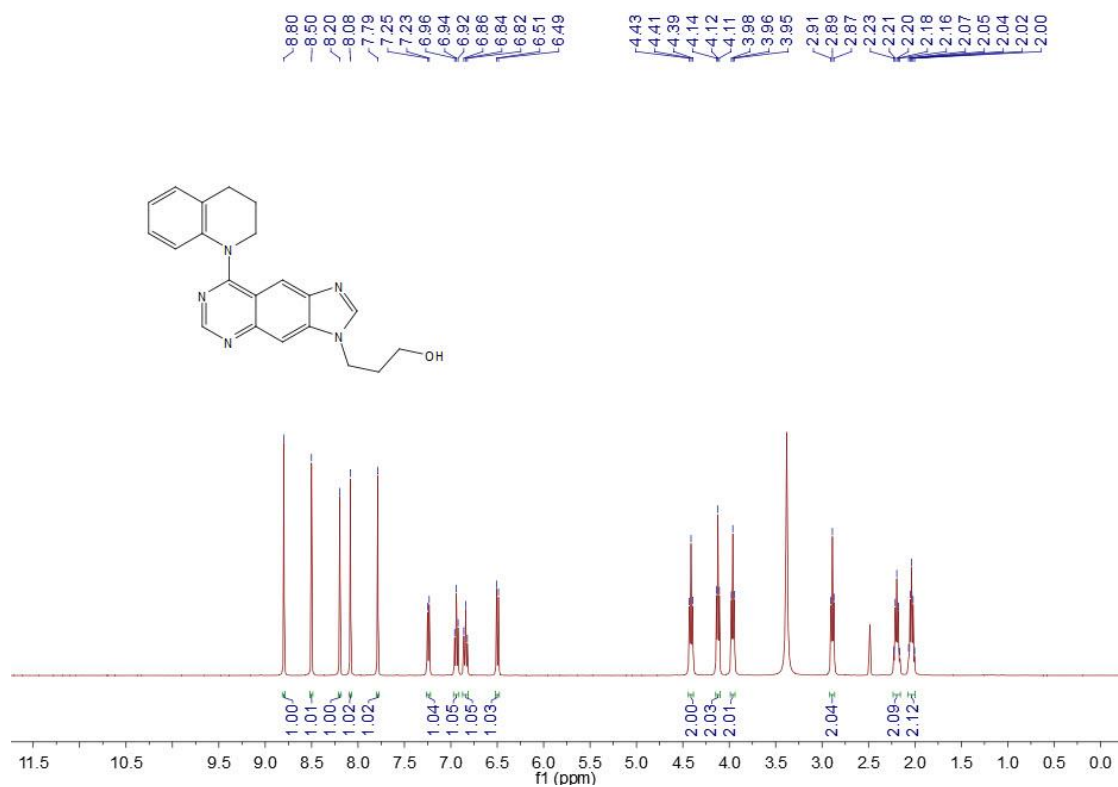

<sup>13</sup>C NMR spectrum of compound **11c**

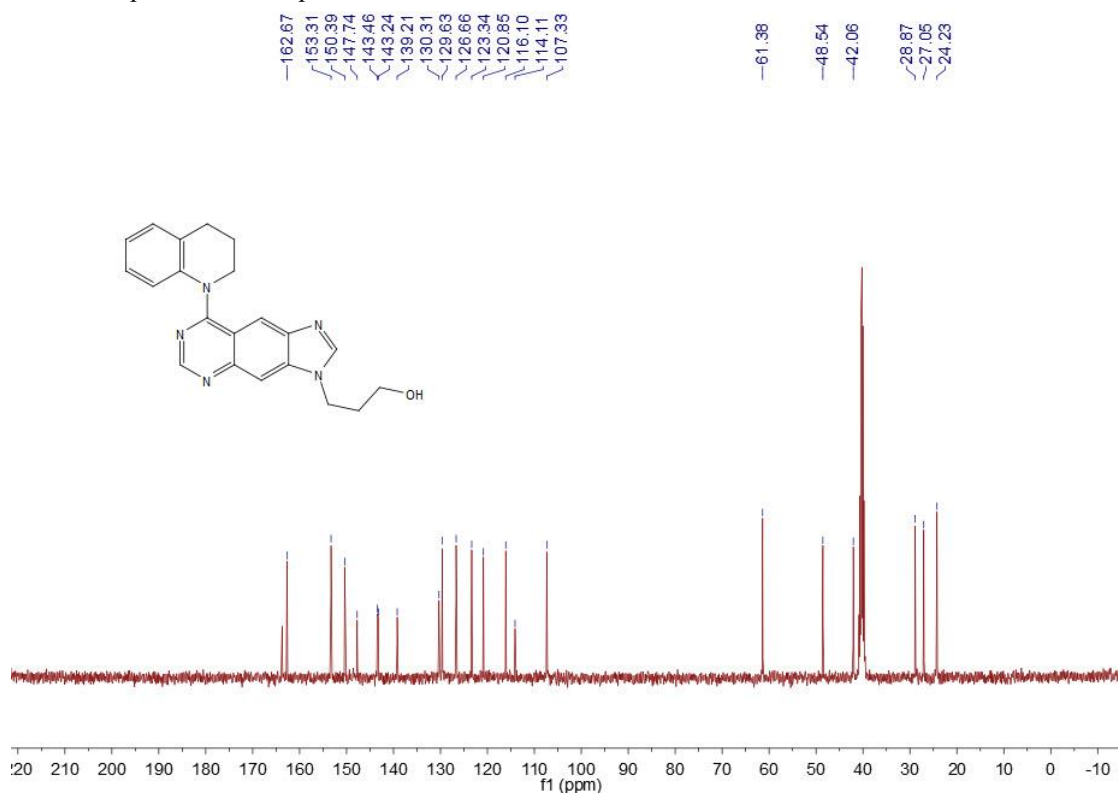

<sup>1</sup>H NMR spectrum of compound **11c**

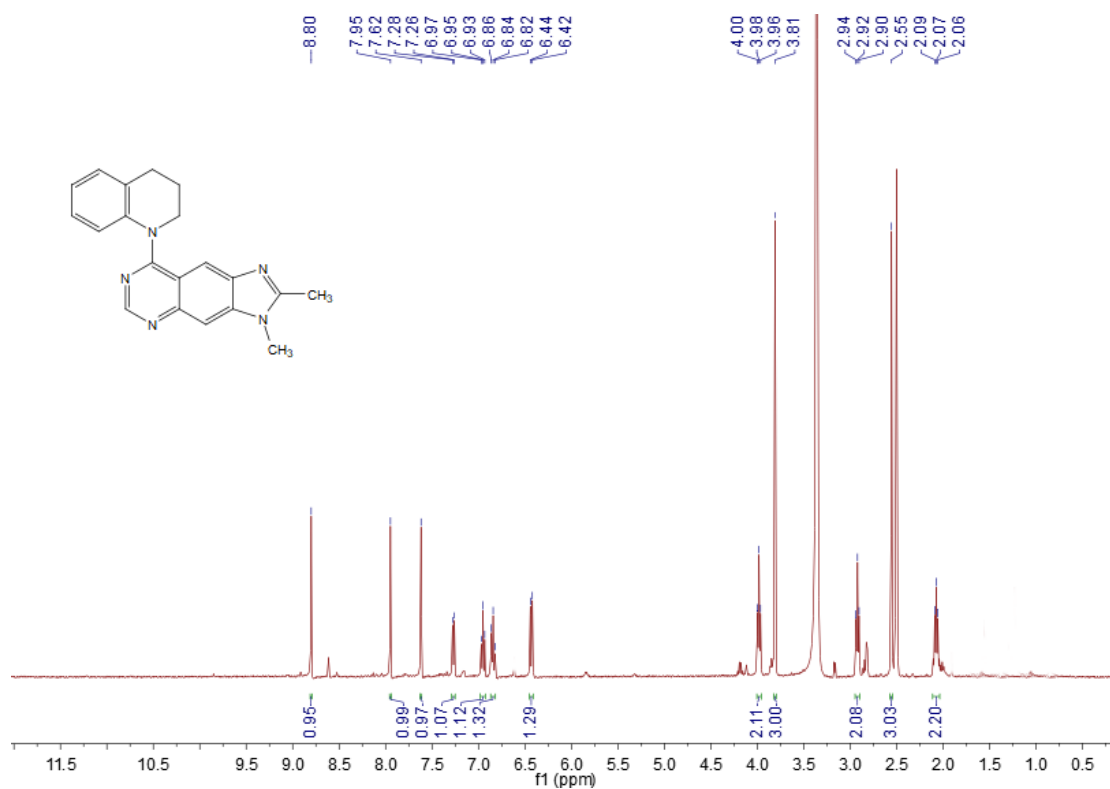

<sup>1</sup>H NMR spectrum of compound **11e**

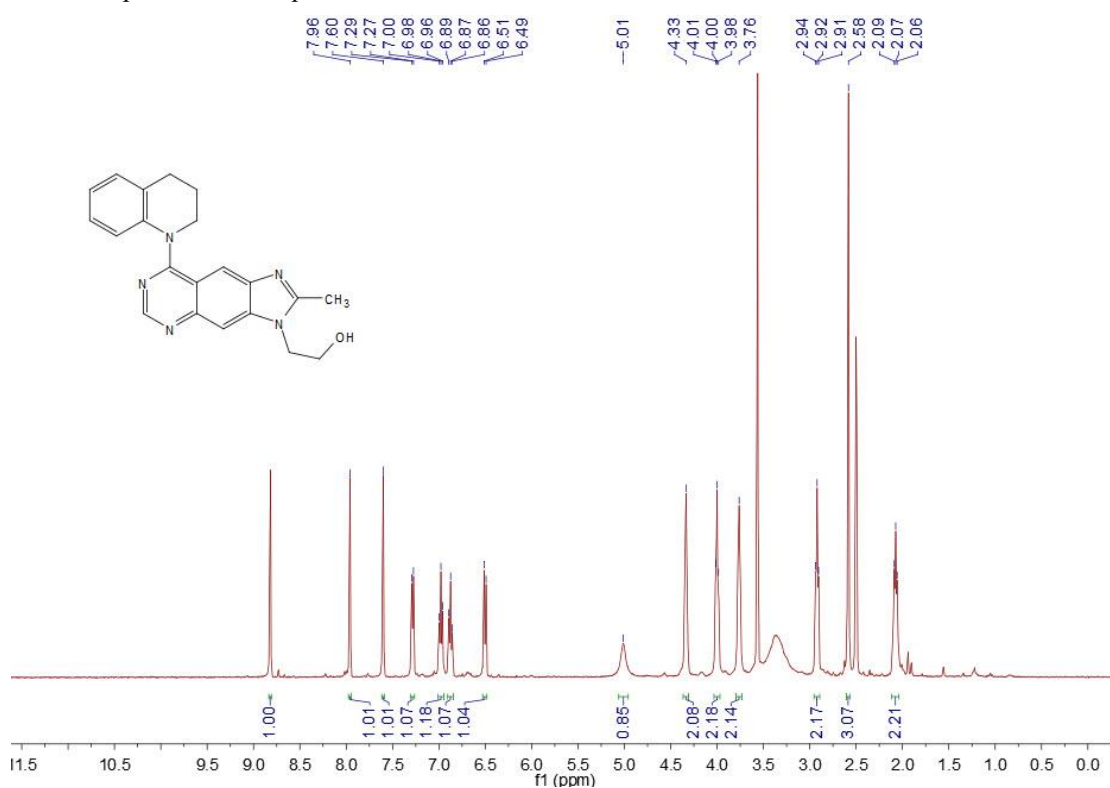

<sup>13</sup>C NMR spectrum of compound **11e**

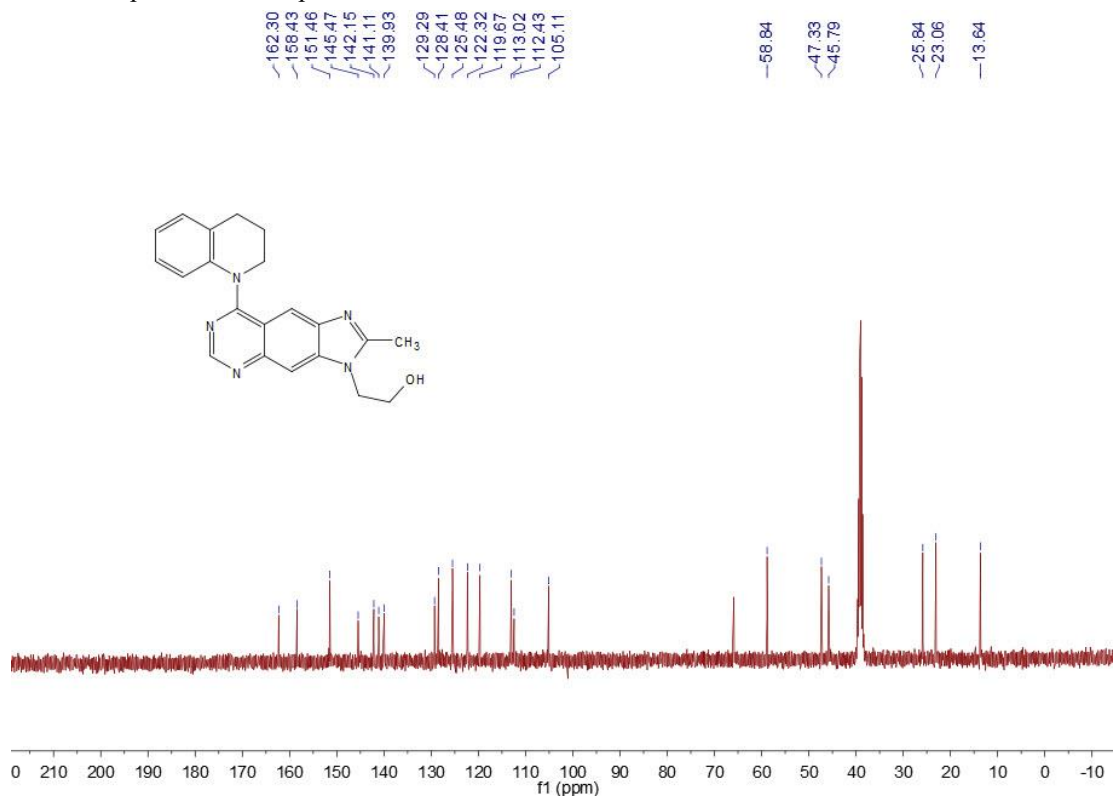

<sup>1</sup>H NMR spectrum of compound **11f**

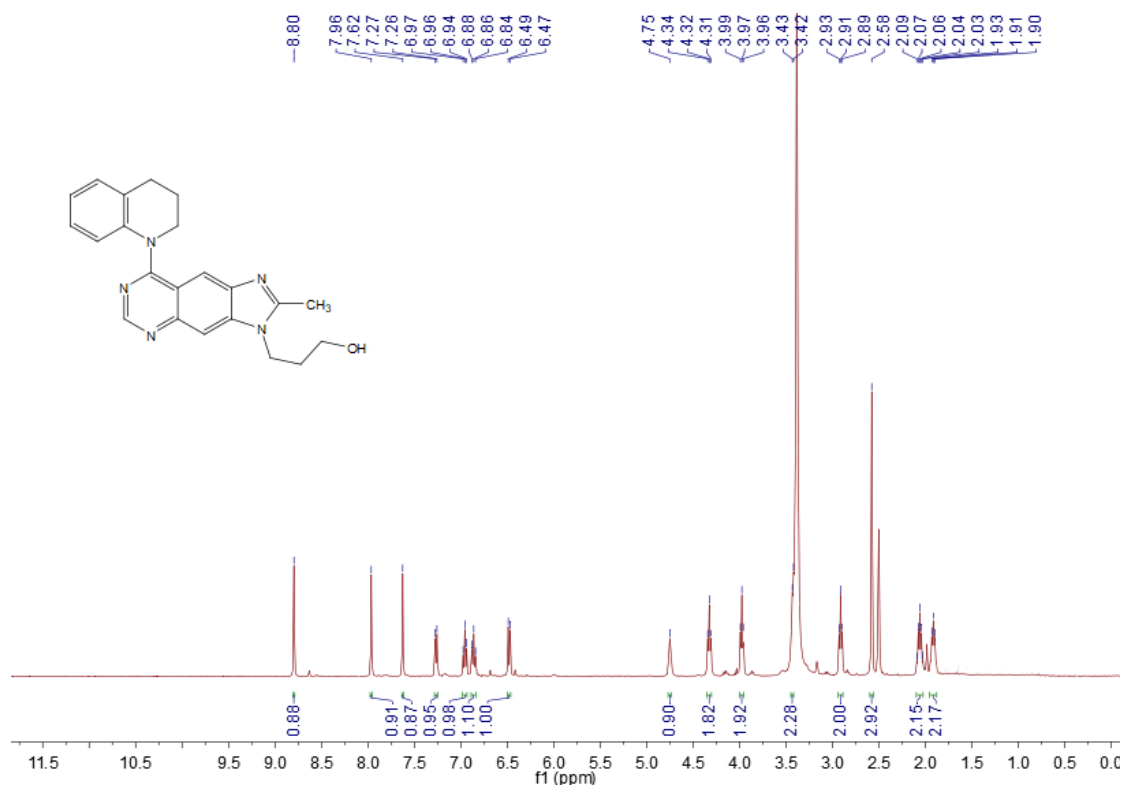

<sup>1</sup>H NMR spectrum of compound **12a**

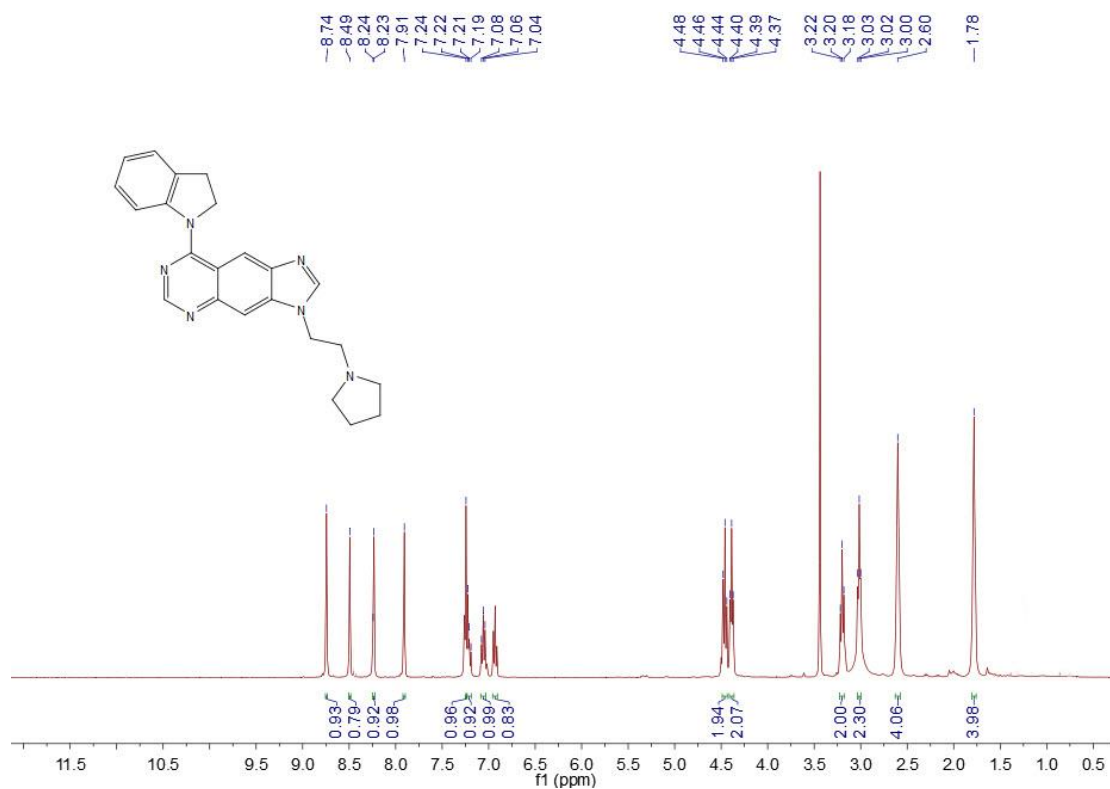

<sup>13</sup>C NMR spectrum of compound **12a**

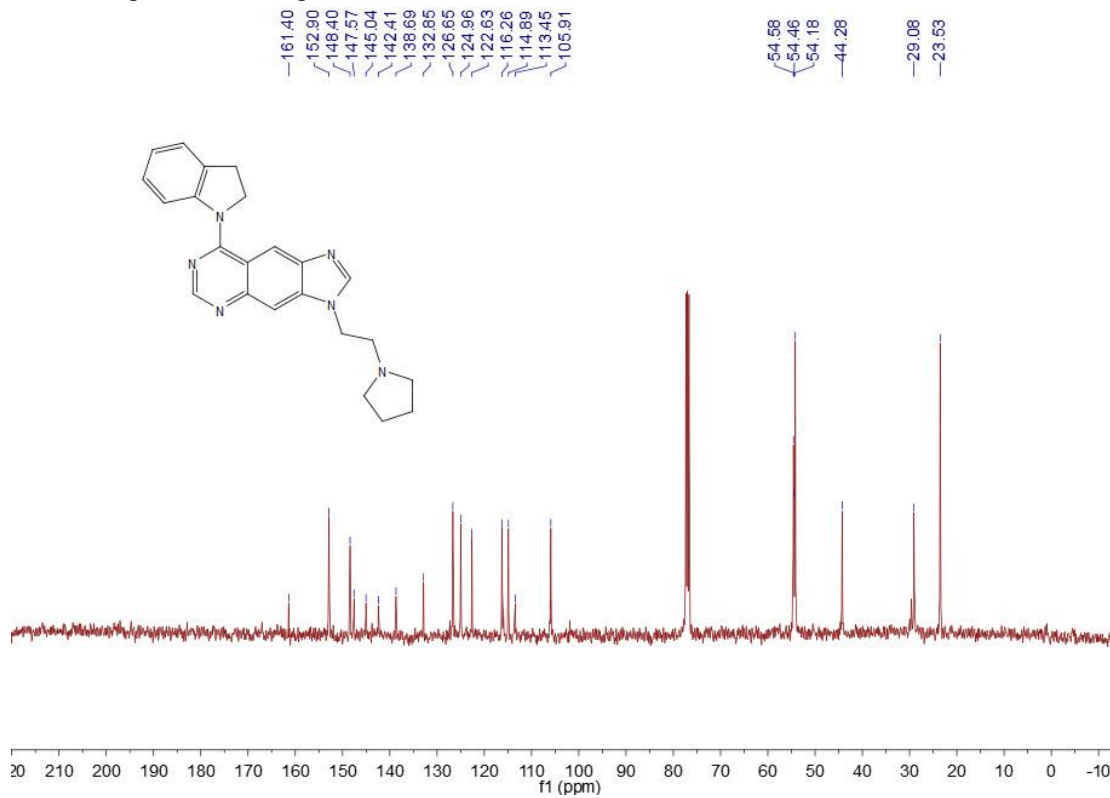

<sup>1</sup>H NMR spectrum of compound **12b**

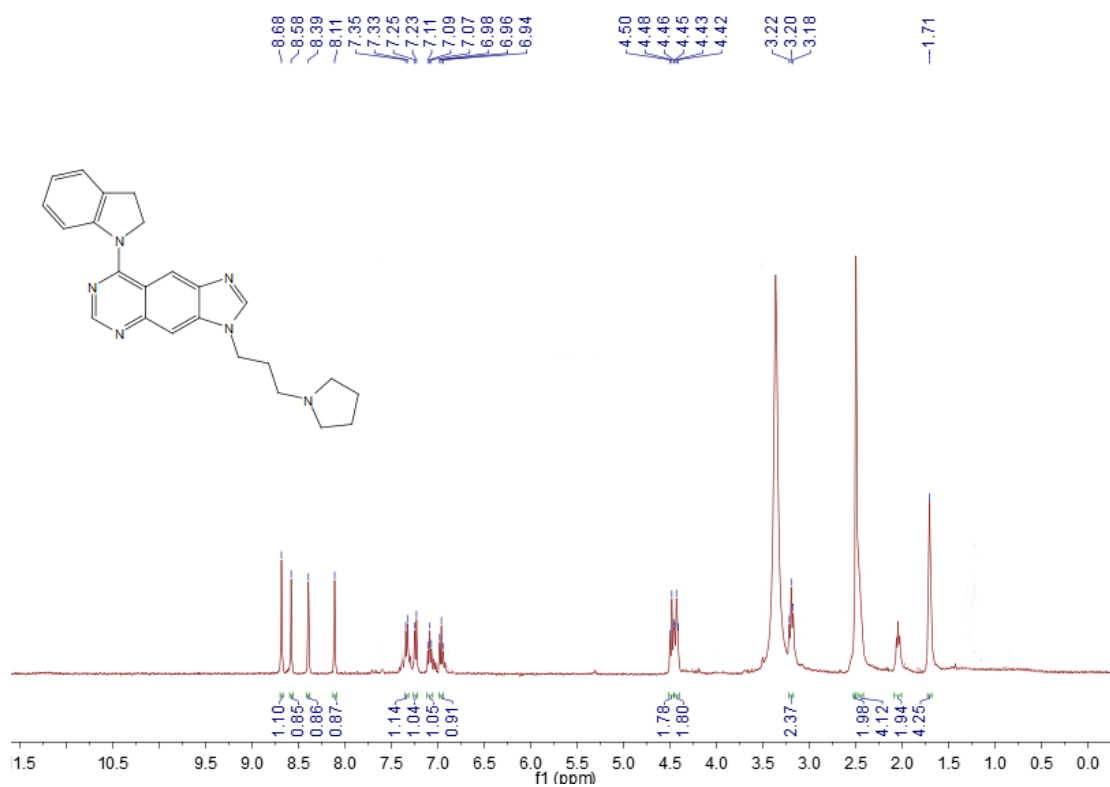

<sup>1</sup>H NMR spectrum of compound **12c**

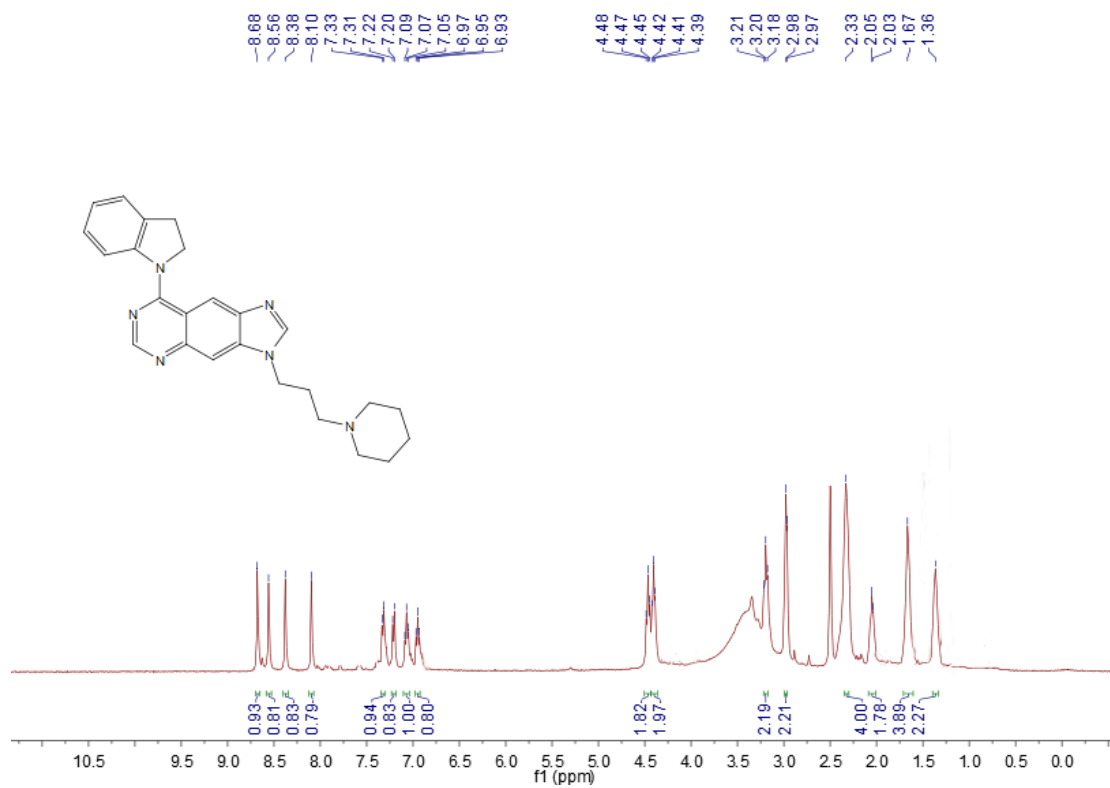

<sup>1</sup>H NMR spectrum of compound **13c**

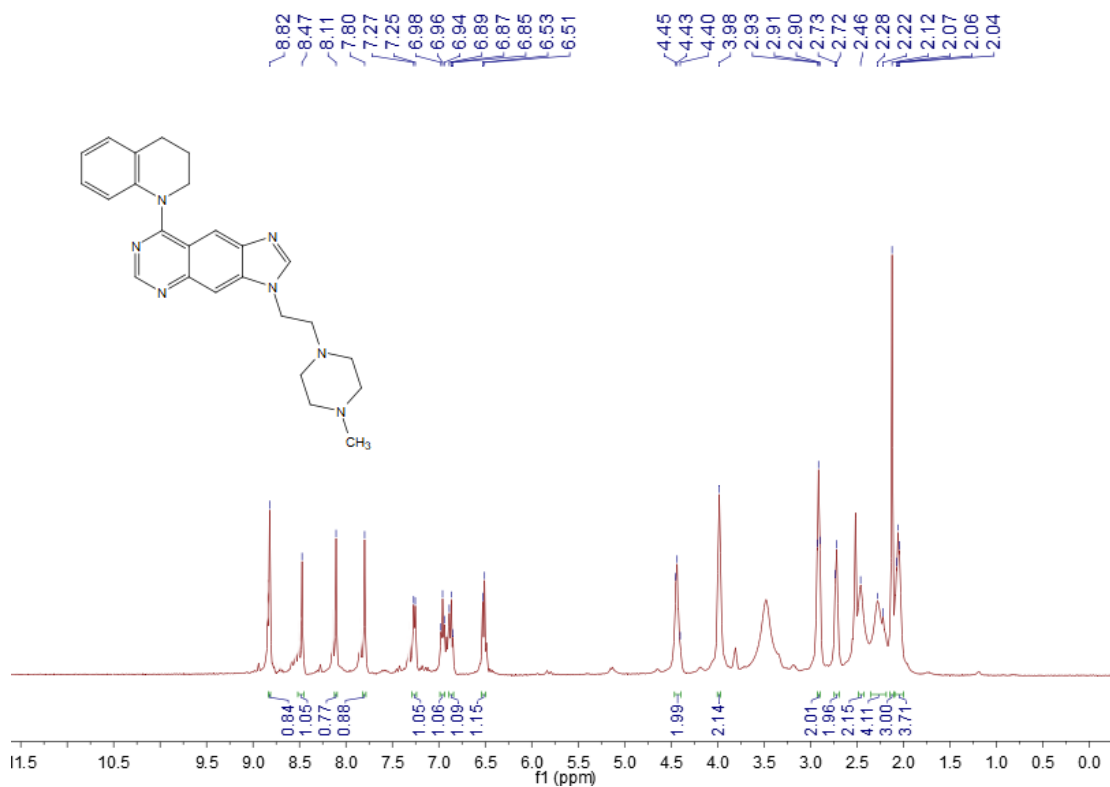

<sup>1</sup>H NMR spectrum of compound **13d**

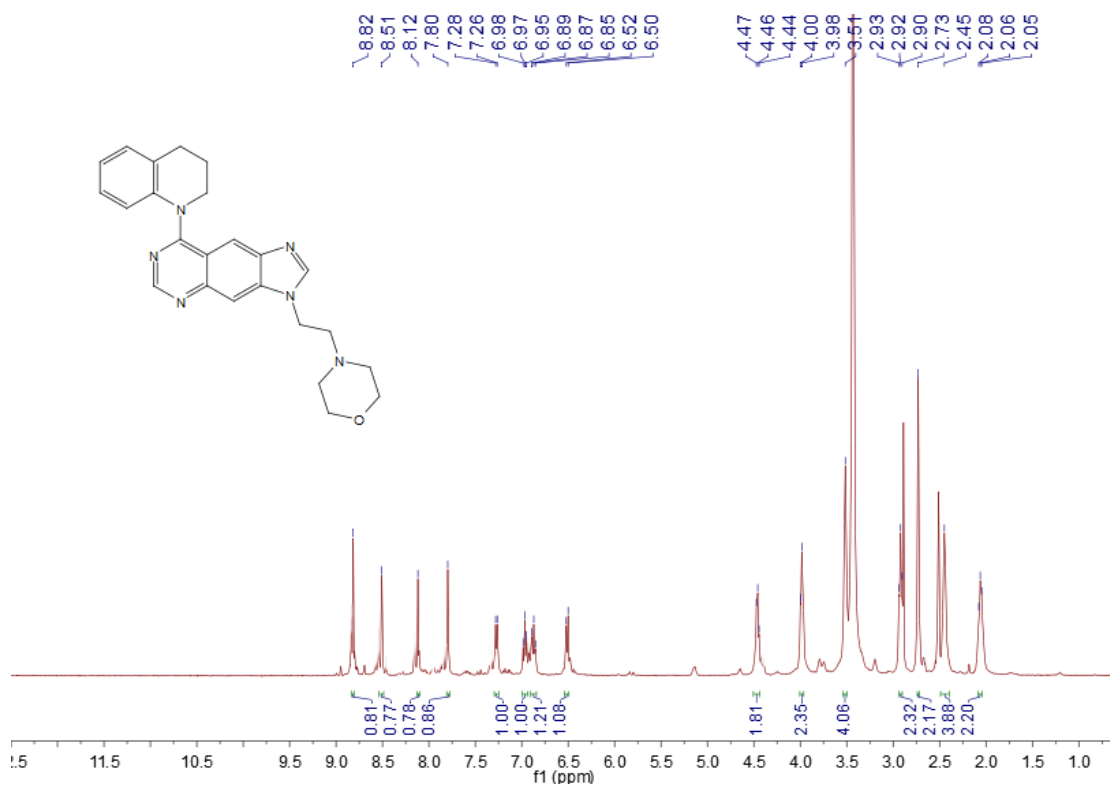

<sup>1</sup>H NMR spectrum of compound **13e**

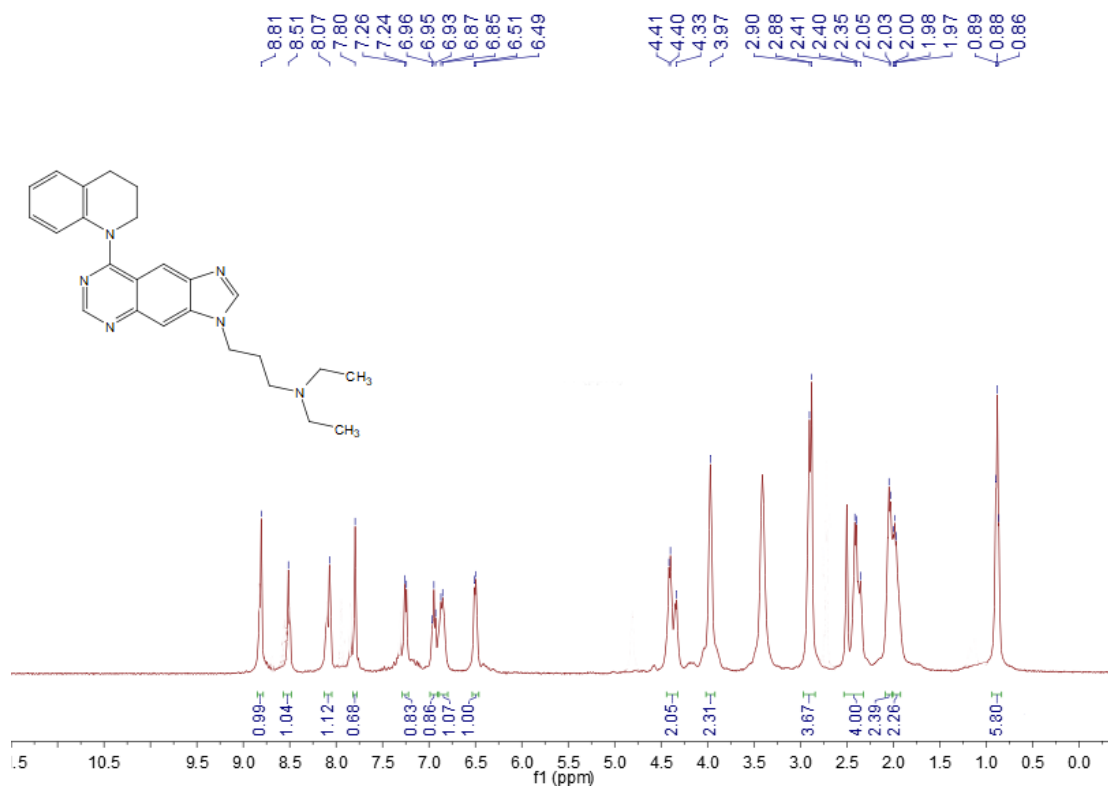

<sup>1</sup>H NMR spectrum of compound **13i**

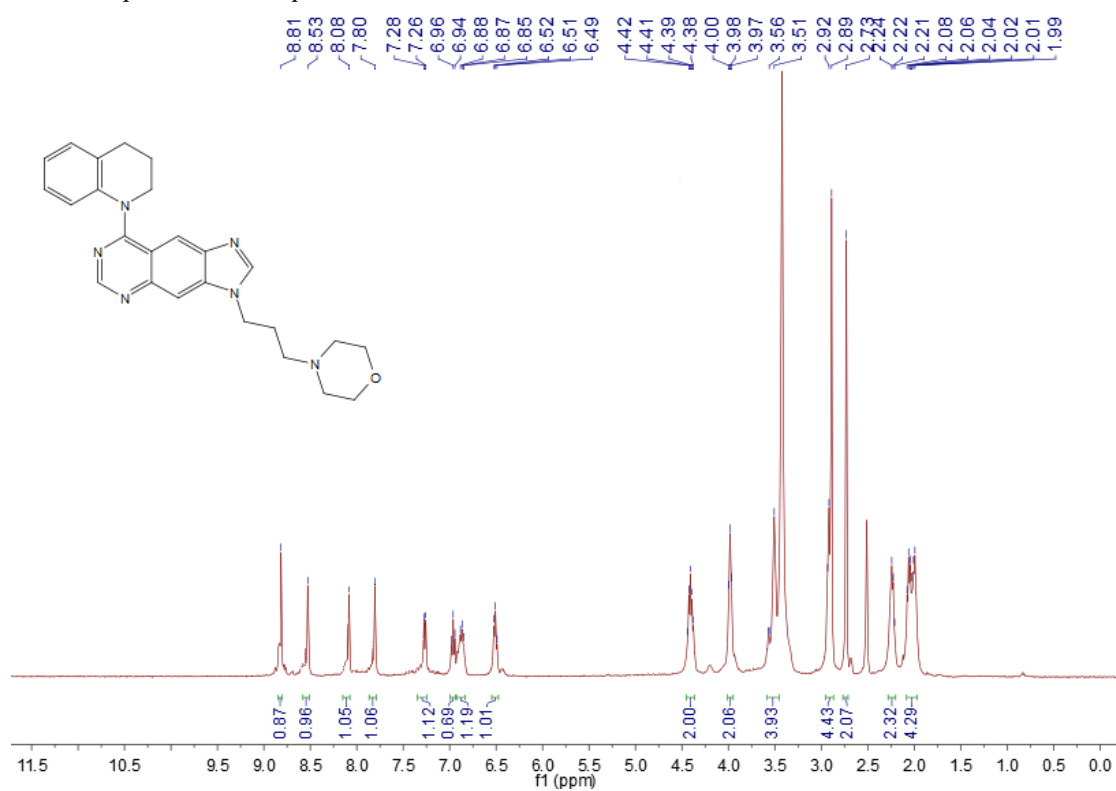

Supplement: c8nj03594f1.pdf [file c8nj03594f1.pdf]
